# Supplementary material
Source: PubMed Central journal article supplement (PMC6438459)
Supplement: NIHMS80777-supplement-Supplemental_Publication_Material.pdf [file NIHMS80777-supplement-Supplemental_Publication_Material.pdf]

# **SUPPLEMENTAL MATERIAL**

**Supplemental Table 1**

| <b>Emotional Stressors</b>            | <b>Physical Stressors</b>            |
|---------------------------------------|--------------------------------------|
| Sudden death of daughter              | Fall and head Injury                 |
| Argument with neighbour               | Walking to car against a strong wind |
| Bereavement                           | Scottish country dancing             |
| Work deadlines                        | Alcohol withdrawal                   |
| Dispute with work colleagues          | Non-infective exacerbation of COPD   |
| Stress of selling house               | Fell over while skiing               |
| Carer for husband                     |                                      |
| Witnessed cardiac arrest              |                                      |
| Bridge game re-arranged               |                                      |
| Public speaking                       |                                      |
| Singing in choir                      |                                      |
| Had sex with ex-partner               |                                      |
| Infidelity                            |                                      |
| Chronic, multiple stresses            |                                      |
| Looking after grandchildren full time |                                      |

**Supplemental Table 1.** Stressor events in the takotsubo patients grouped by emotional or physical upset.

COPD, chronic obstructive pulmonary disease

Supplemental Table 2

|                            | Patients with<br>Takotsubo<br>Cardiomyopathy<br>(Acute)<br>n=55 | Patients with<br>Takotsubo<br>Cardiomyopathy<br>(5 Months)<br>n=48 | Matched<br>control<br>subjects<br>n=51 | p value<br>Acute vs<br>Control | p value<br>5 Months<br>vs Control | p value<br>Acute vs<br>5-Month<br>Follow-up |
|----------------------------|-----------------------------------------------------------------|--------------------------------------------------------------------|----------------------------------------|--------------------------------|-----------------------------------|---------------------------------------------|
| <b>Native T2* (ms)</b>     |                                                                 |                                                                    |                                        |                                |                                   |                                             |
| Ballooning Segments        | 27.6±0.65                                                       | 23.9±0.83                                                          | 24.1±1.01                              | <b>0.004</b>                   | 0.88                              | <b>&lt;0.001</b>                            |
| Non-Ballooning Segments    | 26.4±0.58                                                       | 23.8±0.68                                                          | 24.1±0.92                              | <b>0.04</b>                    | 0.75                              | <b>0.001</b>                                |
| Whole left ventricle       | 26.6±0.51                                                       | 23.6±0.60                                                          | 23.9±0.79                              | <b>0.004</b>                   | 0.64                              | <b>&lt;0.001</b>                            |
| Basal                      | 25.5±0.67                                                       | 23.5±0.79                                                          | 24.2±1.03                              | 0.27                           | 0.62                              | 0.01                                        |
| Mid-cavity                 | 27.7±0.61                                                       | 23.8±0.73                                                          | 24.9±0.93                              | <b>0.01</b>                    | 0.31                              | <b>&lt;0.001</b>                            |
| Apical                     | 26.7±0.73                                                       | 22.9±0.88                                                          | 21.8±1.12                              | <b>&lt;0.001</b>               | 0.42                              | <b>&lt;0.001</b>                            |
| <b>T2* Post USPIO (ms)</b> |                                                                 |                                                                    |                                        |                                |                                   |                                             |
| Ballooning Segments        | 13.2±0.47                                                       | 11.7±0.61                                                          | 13.5±0.76                              | 0.68                           | 0.06                              | <b>0.03</b>                                 |
| Non-Ballooning Segments    | 13.1±0.42                                                       | 12.6±0.47                                                          | 13.5±0.69                              | 0.57                           | 0.27                              | 0.19                                        |
| Whole left ventricle       | 13.3±0.39                                                       | 12.2±0.46                                                          | 13.4±0.61                              | 0.81                           | 0.11                              | <b>0.02</b>                                 |

|            |           |           |           |      |      |             |
|------------|-----------|-----------|-----------|------|------|-------------|
| Basal      | 13.2±0.45 | 12.2±0.55 | 13.9±0.69 | 0.42 | 0.06 | 0.14        |
| Mid-cavity | 13.9±0.42 | 12.6±0.49 | 13.9±0.65 | 0.92 | 0.13 | <b>0.01</b> |
| Apical     | 12.3±0.44 | 11.2±0.50 | 12.1±0.68 | 0.83 | 0.31 | <b>0.03</b> |

---

**Supplemental Table 2. Native and post-USPIO T2\* for Takotsubo patients at acute presentation and at follow-up compared to controls.**

*p* values for comparisons were calculated using *t*-tests with degrees of freedom estimated by the Satterhwaite method

USPIO, ultrasmall superparamagnetic particles of iron oxide

Supplemental Figure 1.

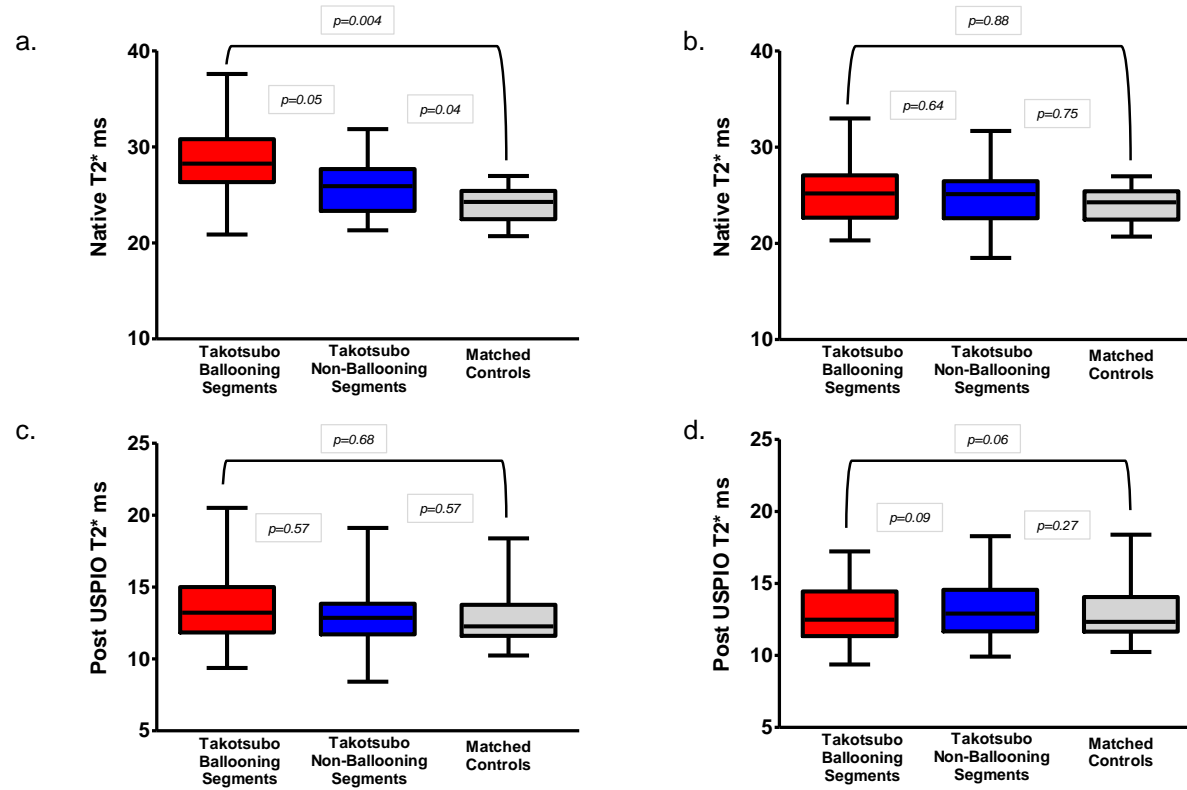

Supplemental Figure 1. Native T2\* in the myocardium in ballooning and non-ballooning segments versus matched controls a- at acute presentation and b – at follow-up and Post USPIO T2\* in the myocardium in ballooning and non-ballooning segments versus matched controls

c- at acute presentation and d – at follow-up Data shown as median, 25th and 75th centiles and maximum and minimum (whiskers); USPIO,  
ultrasmall superparamagnetic particles of iron oxide

## Supplemental Figure 2

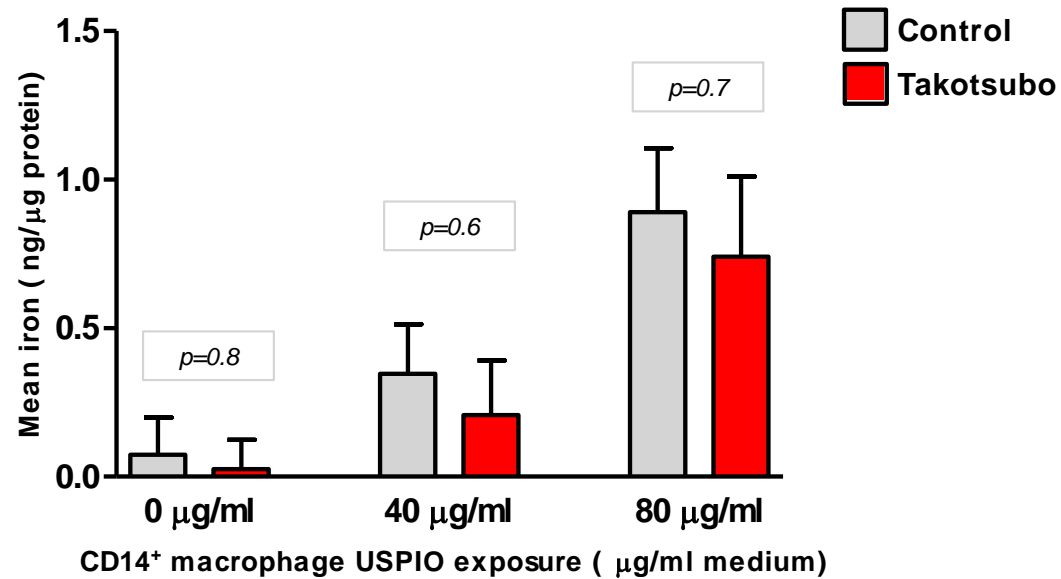

**Supplemental Figure 2.** Mean USPIO (Ferumoxytol; AMAG Pharmaceuticals, Waltham, MA, USA) uptake after 24hrs exposure of human-derived macrophages differentiated *ex-vivo* from peripheral CD14<sup>+</sup> monocytes using autologous serum. Despite a clear dose dependent increase in USPIO uptake ( $p < 0.001$ ), there were no differences between acute takotsubo and control at any given USPIO concentration exposure. USPIO, ultrasmall superparamagnetic particles of iron oxide
